# Supplementary material
Source: Royal Society of Chemistry journal article supplement (doi:10.1039/d6nr00433d)
Supplement: d6nr00433d1.pdf [file d6nr00433d1.pdf]

*Supplementary Information for*

**Adsorption conformation induced kondo switch of fluorenyl radicals on metal  
surface**

Jia Liu<sup>1,2,3</sup>, Yanbo Li<sup>1,2,3\*</sup>, Jianmin Huang<sup>1,2</sup>, Shijing Tan<sup>1,2</sup>, Chuanxu Ma<sup>1,2</sup>, Qitang Fan<sup>1,2\*</sup>, and Bing  
Wang<sup>1,2\*</sup>

<sup>1</sup>Hefei National Research Center for Physical Sciences at the Microscale, CAS Center for  
Excellence in Quantum Information and Quantum Physics, and New Cornerstone Science  
Laboratory, University of Science and Technology of China, Hefei, Anhui 230026, China

<sup>2</sup>Hefei National Laboratory, University of Science and Technology of China, Hefei 230088, China

<sup>3</sup>These authors contributed equally to this work

\*Corresponding author. Email: qtfan@ustc.edu.cn (Q.F.); bwang@ustc.edu.cn (B.W.)

**This file includes:**

Supplementary Methods

Supplementary Figures 1–4

## Supplementary Methods

The synthesis of 3,6-bis(4-bromophenyl)-9*H*-fluorene **5** is achieved by the following two-step reaction.

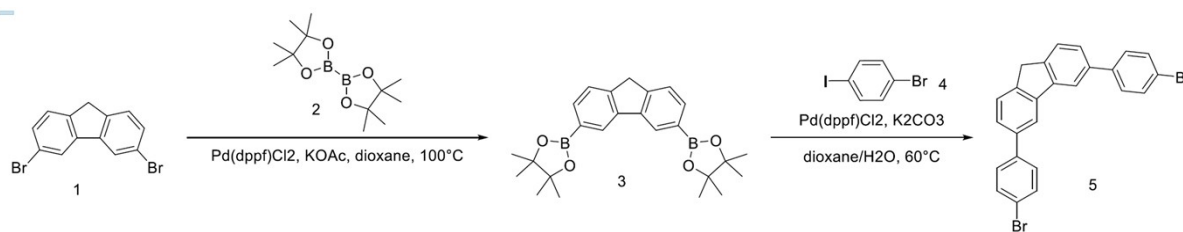

### Synthesis of Compound **3**

Compound **1** (161 mg) and compound **2** (254 mg) were placed in a 50 mL three-necked round-bottom flask, followed by the addition of 1,4-dioxane as solvent. Bis(1,1'-diphenylphosphino)ferrocene palladium(II) dichloride (Pd(dppf)Cl<sub>2</sub>, 73.2 mg) and potassium acetate (196 mg) were then added to the reaction mixture. The resulting suspension was refluxed at 100 °C for 16 h under stirring. After completion of the reaction, the mixture was cooled to room temperature. The crude product was adsorbed onto silica gel and purified by column chromatography to afford compound **3** as a white solid (160 mg, 77% yield).

### Synthesis of Compound **5**

Compound **3** (160 mg) was added to a 50 mL three-necked round-bottom flask, followed by the addition of 1,4-dioxane and water. Subsequently, *p*-bromoiodobenzene (215 mg), bis(1,1'-diphenylphosphino)ferrocene palladium(II) dichloride (Pd(dppf)Cl<sub>2</sub>, 56 mg), and potassium carbonate (262.6 mg) were added. The reaction mixture was stirred at 100 °C for 2 h. After cooling to room temperature, the crude product was adsorbed onto silica gel and purified by column chromatography to give compound **5** as a white solid (90 mg, 50% yield). <sup>1</sup>H NMR (400 MHz, CDCl<sub>3</sub>) δ 8.00–7.99 (m, 2H), 7.63–7.50 (m, 10H), 7.26 (s, 1H), 3.97 (s, 2H), 1.56 (s, 2H) was measured, as shown in Supplementary Fig. 1.

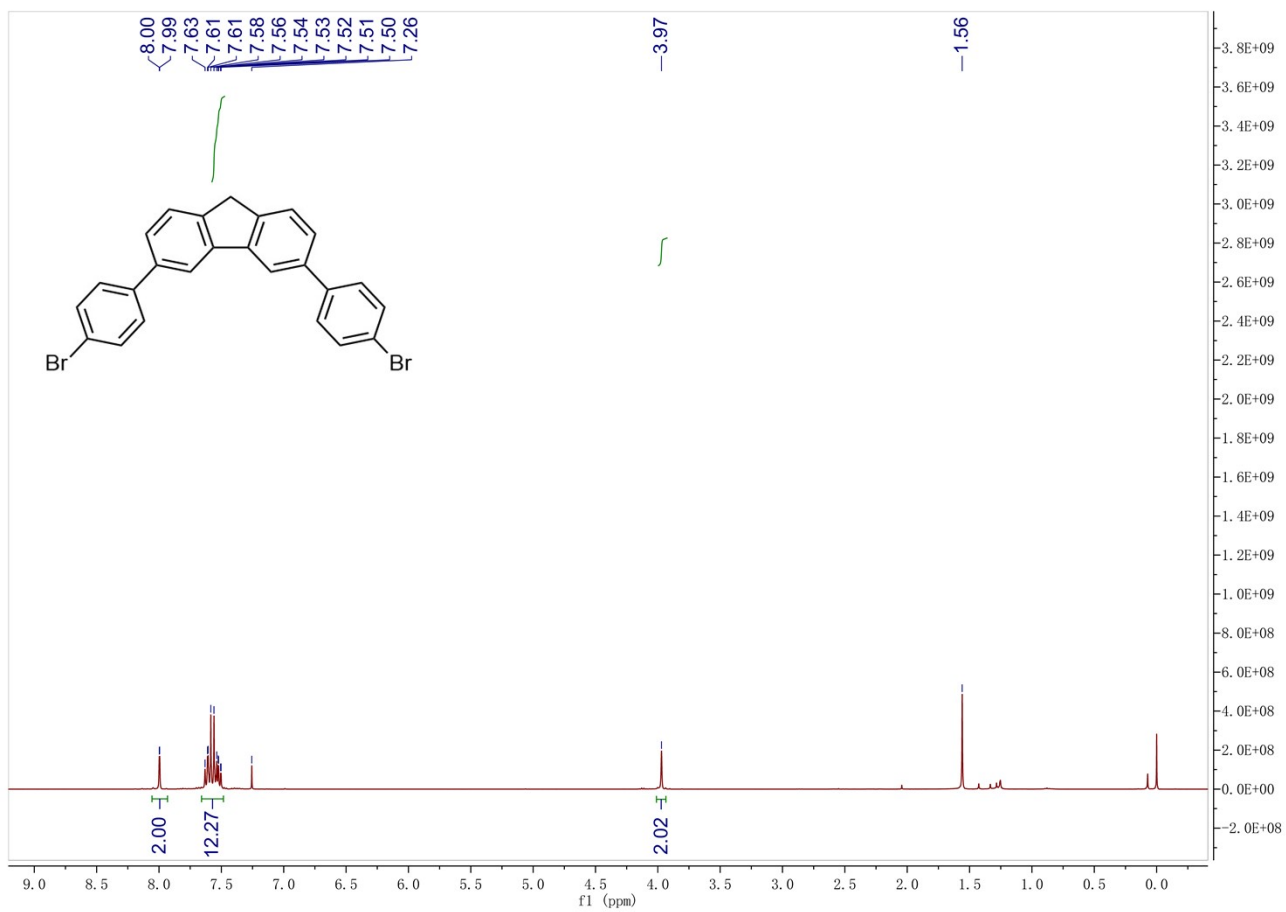

**Supplementary Figure 1. <sup>1</sup>H-NMR spectrum.** Liquid-state <sup>1</sup>H-NMR spectrum of compound 3,6-bis(4-bromophenyl)-9H-fluorene **5**.

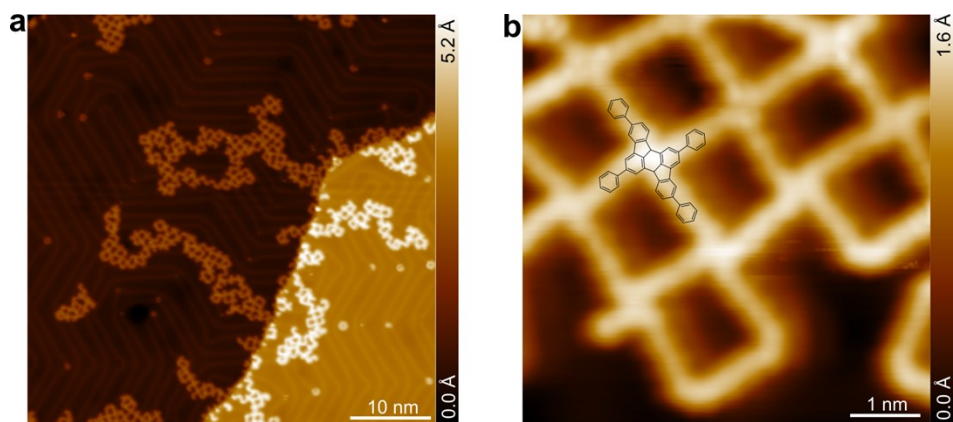

**Supplementary Figure 2.** (a) Large-scale STM image of the covalent product after annealing the sample in Fig. 1e to 623 K. (b) Magnified STM image of a section of grid-like structural motif. Scanning parameters: (a,b)  $U = -1$  V,  $I = 20$  pA.

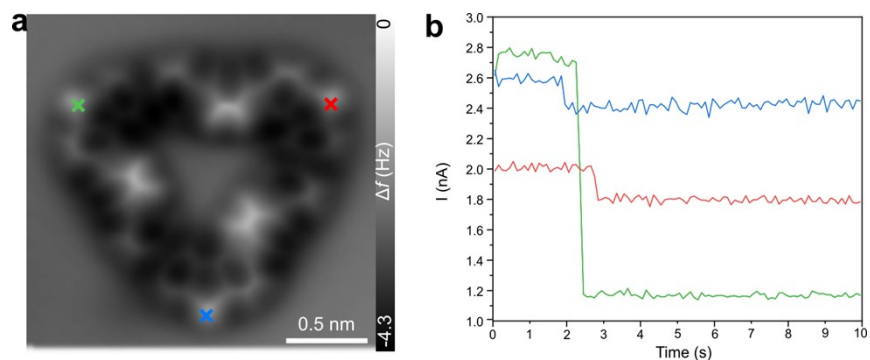

**Supplementary Figure 3. Tip-induced dehydrogenation of the covalent trimer macrocycle.** (a) Constant-height nc-AFM image of the covalent trimer macrocycle shown in Fig. 1g. Crosses indicate the tip positions used for site-selective hydrogen removal from the CH<sub>2</sub> groups. (b) Tunneling current recorded as a function of time during the application of a 2.8 V voltage pulse at a CH<sub>2</sub> site. The abrupt downward jump in the current indicates the removal of a single hydrogen atom.

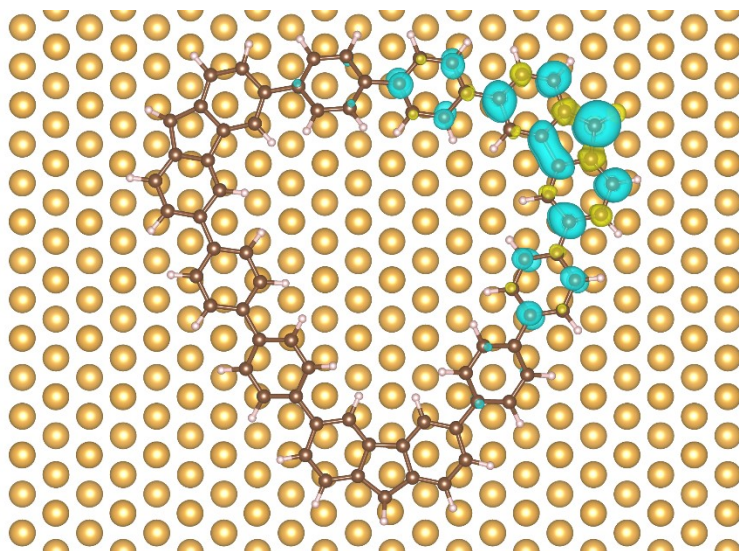

**Supplementary Figure 4.** DFT Calculated spin density of the trimer macrocycle consisting of two chemisorbed and one physisorbed fluorenyl radicals.
